# Supplementary material for: Terminal α1,2-fucosylation of glycosphingolipids by FUT1 is a key regulator in early cell-fate decisions
Source: PubMed Central journal article supplement (PMC11467398; doi:10.1038/s44319-024-00243-1), 2024-09-10
Supplement: 44319_2024_243_MOESM5_ESM.pdf [file 44319_2024_243_MOESM5_ESM.pdf]

## Expanded View Figures

**Figure EV1. Co-expression of FUT1 with pluripotency and primary germ layer markers in early embryonic development.**

(A) Left: Representative in silico 3D transcriptomic analysis showing co-expression of FUT1 with pluripotent markers (NANOG, SOX2, and OCT3/4) on E6.0 in sections #351–370 from a sequential series of sections. Right: 2D corn plots showing FUT1 and pluripotent gene expression on E6.0. Abbreviations represent A, anterior; P, posterior; L, left; R, right; Pr, proximal; D, distal. (B) 2D corn plots showing the expression of ectoderm markers, OTX2, PAX6, ZIC1, SOX2, SOX1, HOXC8, PHOX2b, OLIG2, PAX7, HOXB9, and DBX1 on E7.5 embryos. (C) 2D corn plots showing the expression of DE markers, HHEX, FOXA2, SOX17, and FOXA1 on E7.5. (D) 2D corn plots showing the spatiotemporal expression mesoderm genes, BRY (T gene) and MIXL1 on E7.0–E7.5; HOPX, NKX2.5, ISL1, HAND1, IRX3, MESP2, FOXC1, FOXF1, and CDX2 on E7.5. 2D and 3D gene expression analysis was obtained by using the database of mouse gastrulation on E5.5–E7.5 (<http://egastrulation.sibcb.ac.cn>).

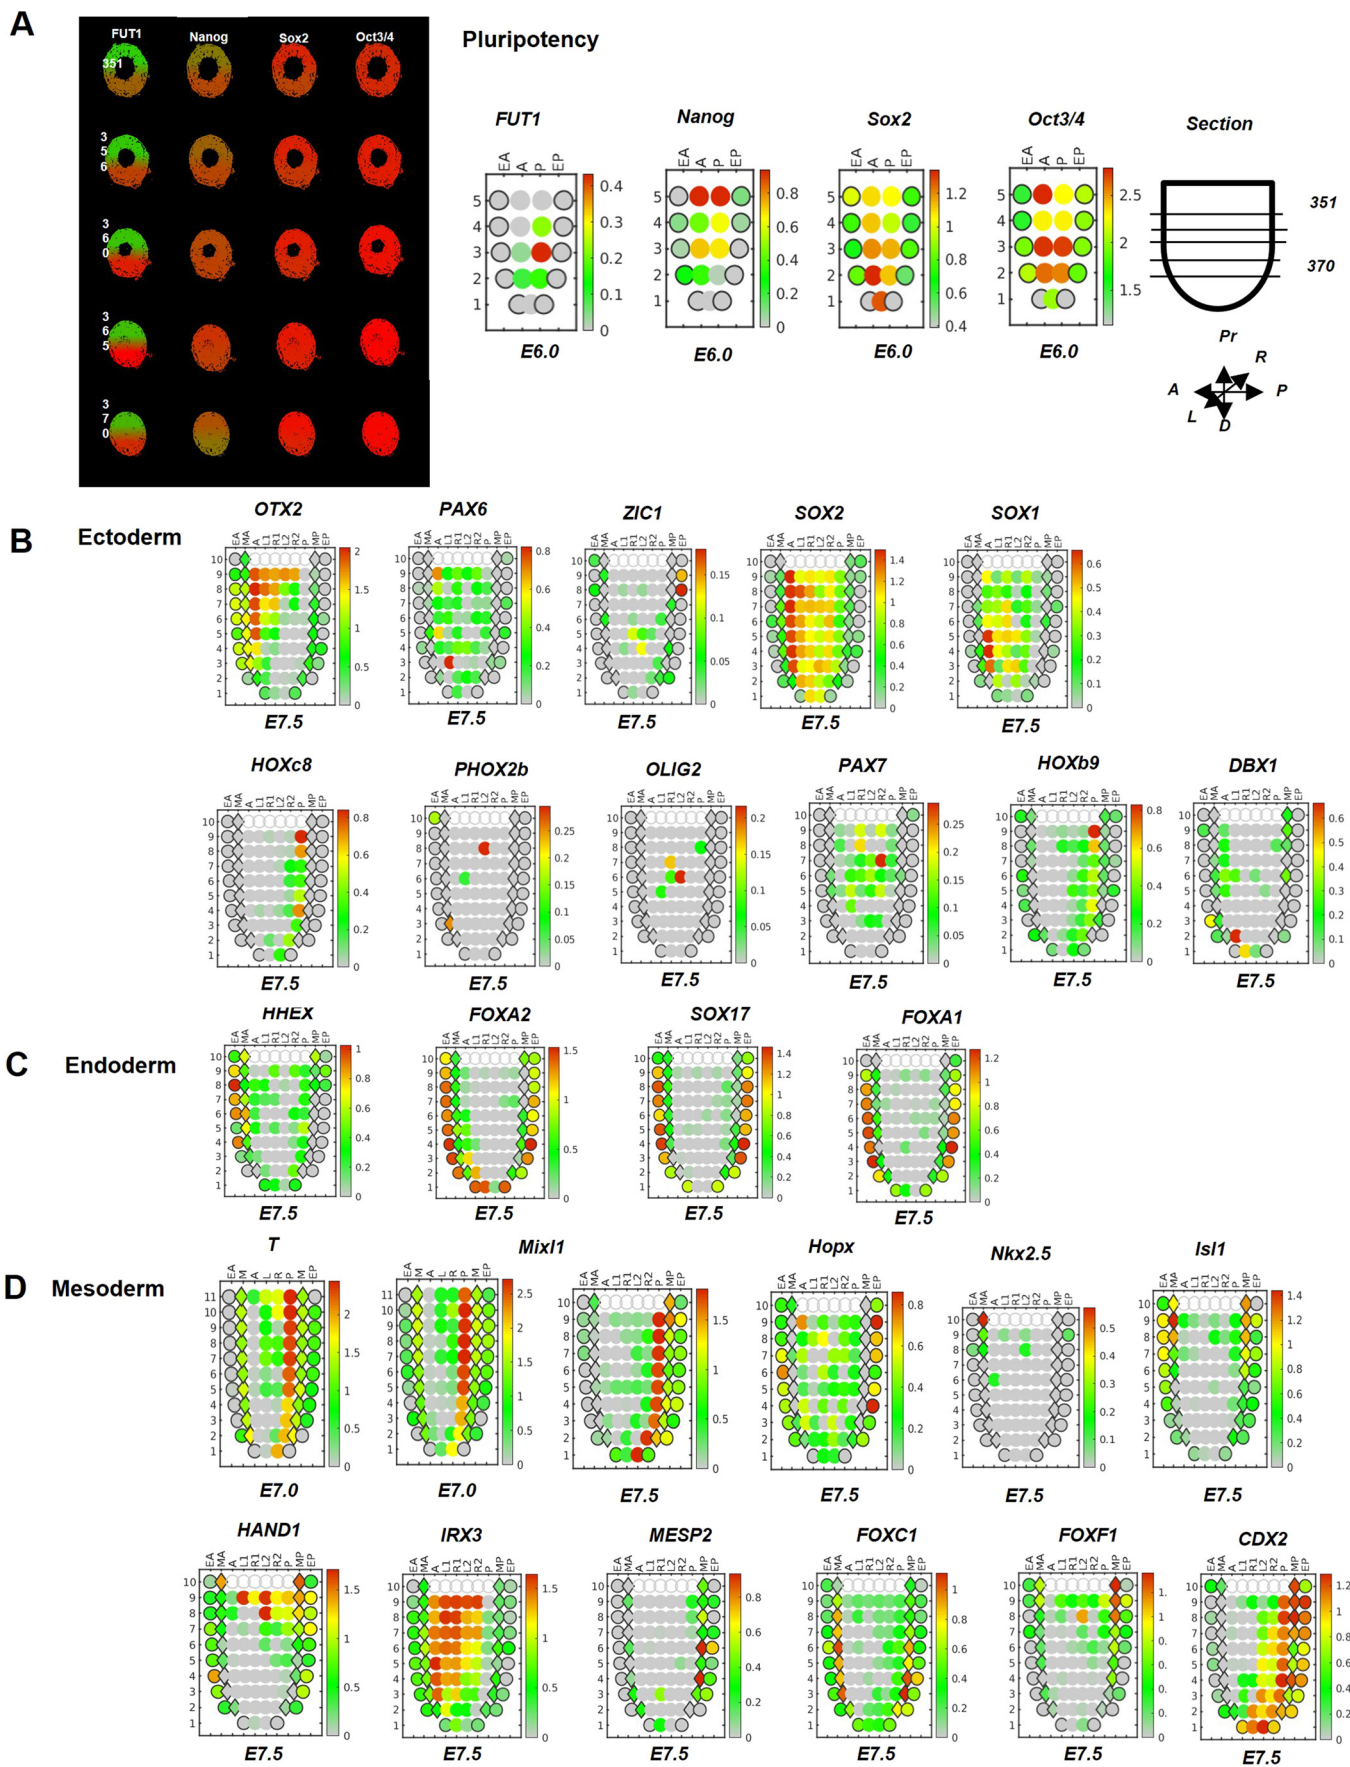

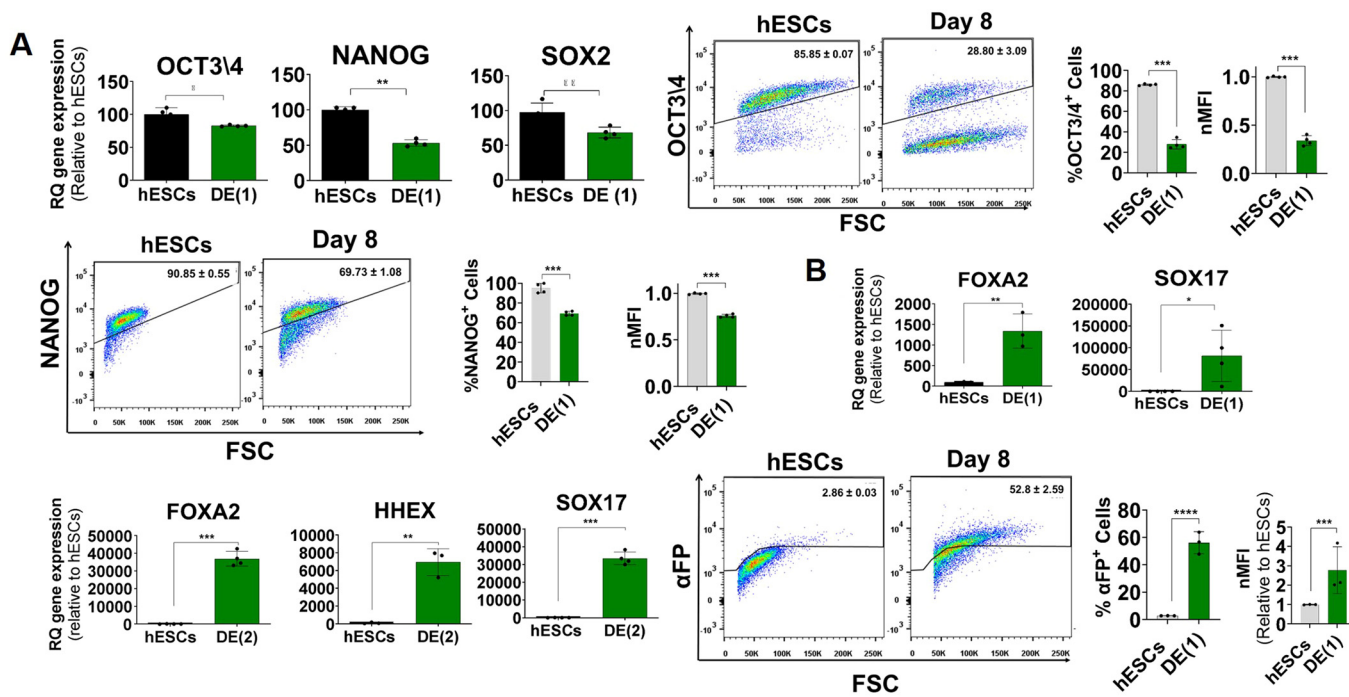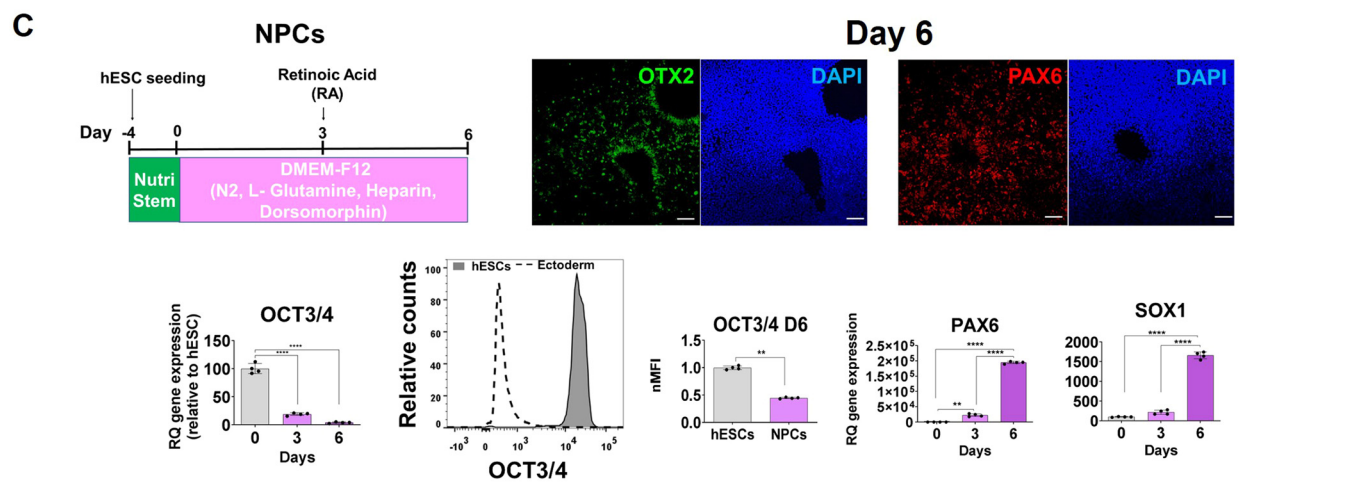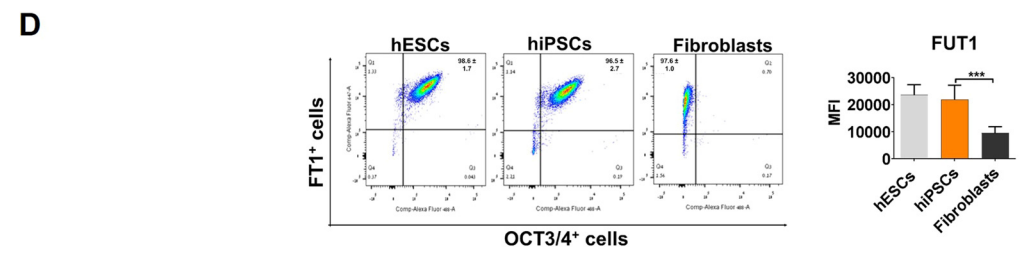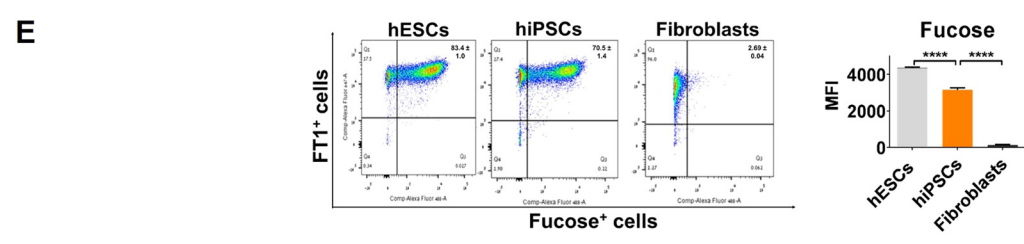

◀ **Figure EV2. FUT1 is downregulated during PC differentiation into the tri-germ layer lineages.**

(A) Up at left: Quantification of pluripotent gene expression as measured by qPCR. Up at right: Quantification of the percentage of hESCs and hESCs-derived DE on day 8 showing the expression of OCT3/4 in histograms, bar chart, and MFI relative to hESCs. Bottom: Quantification of the percentage of hESCs and hESCs-derived DE on day 8 showing the expression of NANOG in histograms, bar chart, and MFI relative to hESCs.  $n = 4$  technical replicates. (B) Up and bottom at left: Quantification of DE-specific markers, FOXA2 and SOX17 as measured by qPCR after hESC differentiation into DE using protocol 1, and FOXA2, SOX17, and HHEX as measured by qPCR after hESC differentiation into DE using protocol 2 ( $n = 3$  technical replicates). Bottom at right: Quantification of the percentage of hESCs and hESCs-derived DE on day 8 showing the expression of  $\alpha$ -FP in histograms and bar chart and MFI relative to hESCs. (C) Up at left: Schematic illustration of hESC differentiation into NPCs via bFGF and RA signaling and BMP inhibition over 6 d. Up at right: Representative immunofluorescent cultures illustrate day 6 NPCs expressing OTX2 (green) and PAX6 (red). Nuclei are stained with DAPI (blue). Scale bars represent 100  $\mu$ m. Bottom: qRT-PCR and flow cytometry analyses of OCT3/4, PAX6, SOX1. The expression of FUT1 and  $\alpha$ -fucose in iPSCs during pluripotency and differentiation is identical to that of hESCs (D) Quantification of the percent of positive cells expressing both the FT1 and OCT3/4 proteins and MFI in hESCs, a pool of hiPSCs and a pool of human fibroblasts. Pooled sample,  $n = 3$  cell lines.  $n = 3$  technical replicates. (E) Quantification of the percent of positive cells expressing FT1 protein and  $\alpha$ -fucose residues and MFI in hESCs, a pool of hiPSCs, and a pool of human fibroblasts. Pooled sample,  $n = 3$  cell lines.  $n = 3$  technical replicates. Data information: In qPCR (A, B), data are presented as means  $\pm$  SD. Two-tailed Student's t-tests \* $p < 0.05$ , \*\* $p < 0.01$ , \*\*\* $p < 0.001$ , \*\*\*\* $p < 0.0001$ . In FACS (A-E), data are presented as means  $\pm$  SD. Ordinary One-way ANOVA \*\* $p < 0.01$ , \*\*\* $p < 0.001$ , \*\*\*\* $p < 0.0001$ .

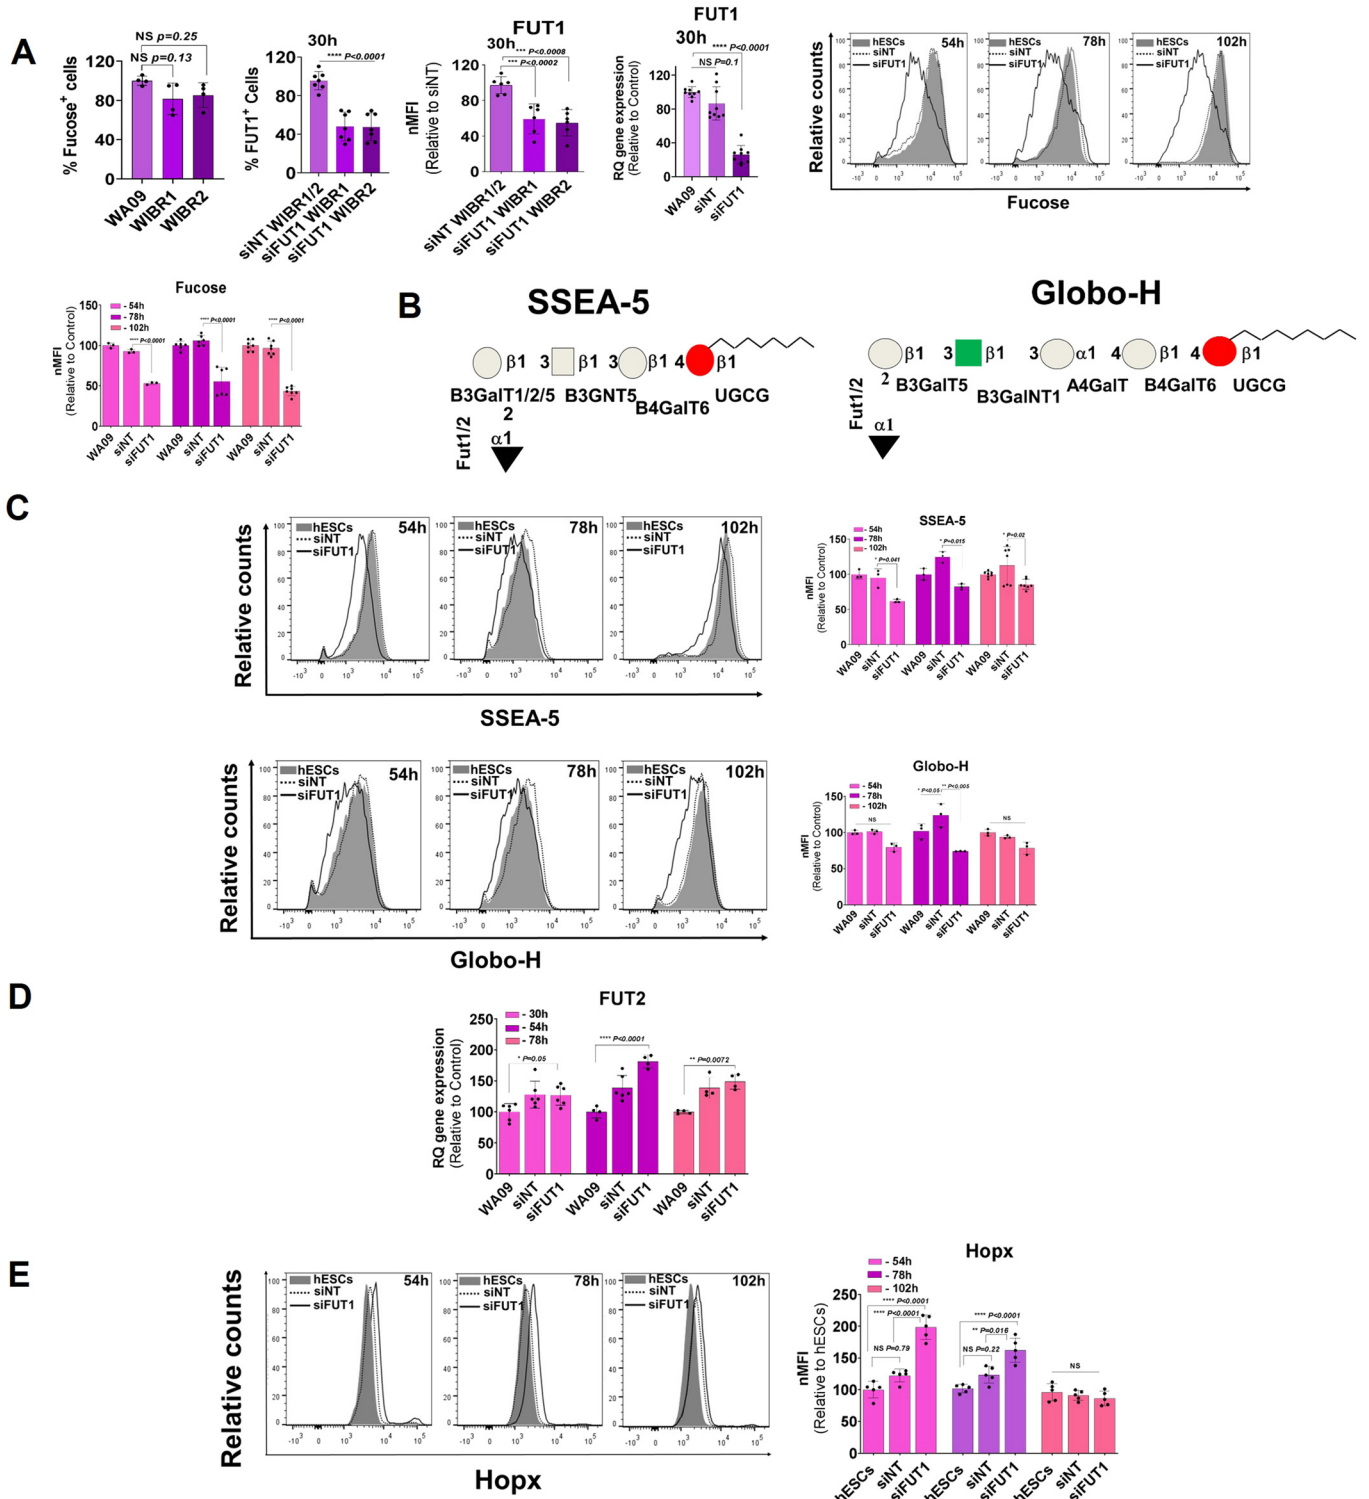

◀ **Figure EV3. Silencing of FUT1 alters mesoderm gene expression.**

(A) Top at left: Quantification of the percent of positive cells expressing  $\alpha$ -fucose residues during pluripotency in three lines of hESCs: WA09, WIBR1, and WIBR2, as measured in FACS. Top at center: Quantification of the percent of positive cells expressing FT1 protein and MFI of WIBR1 and WIBR2 hESCs 30 h after FUT1 mRNA silencing (siFUT1). Negative control is WIBR1 and WIBR2 hESCs transfected with non-targeting siRNA (siNT). Top at right: Quantification of the gene expression of FUT1 in WT, siNT, and siFUT1, WA09 hESCs 30 h after FUT1 mRNA silencing, as measured by qPCR, and representative histograms showing relative counts of WT, siNT, and siFUT1, WA09 hESCs expressing  $\alpha$ -fucose residues 54, 78, and 102 h after FUT1 mRNA silencing. (B) Schematic of Globo-H and SSEA-5 structures encompassing the  $\alpha$ 1,2-fucose end residue with corresponding GTs. (C) Top: Representative histograms showing relative counts of WT, siNT, and siFUT1, WA09 hESCs expressing SSEA-5 and MFI 54, 78, and 102 h after FUT1 mRNA silencing. Bottom: Representative histograms showing relative counts of WT, siNT, and siFUT1, WA09 hESCs expressing Globo-H and MFI 54, 78, and 102 h after FUT1 mRNA silencing. (D) Quantification of the gene expression of FUT2 in WT, siNT, and siFUT1, WA09 hESCs 30, 54, and 78 h after FUT1 mRNA silencing, as measured by qPCR. (E) Representative histograms showing relative counts of WT, siNT, and siFUT1, WA09 hESCs expressing HOPX and MFI 54, 78, and 102 h after silencing.  $n = 4$  technical replicates. Data information: In (A, C, E), data are presented as means  $\pm$  SD. Ordinary One-way ANOVA  $*p < 0.05$ ,  $**p < 0.01$ ,  $***p < 0.001$ ,  $****p < 0.0001$  or non-significant (NS). In (D), data are presented as means  $\pm$  SEM. Two-tailed Student's t-tests  $*p < 0.05$ ,  $**p < 0.01$ ,  $***p < 0.0001$ .

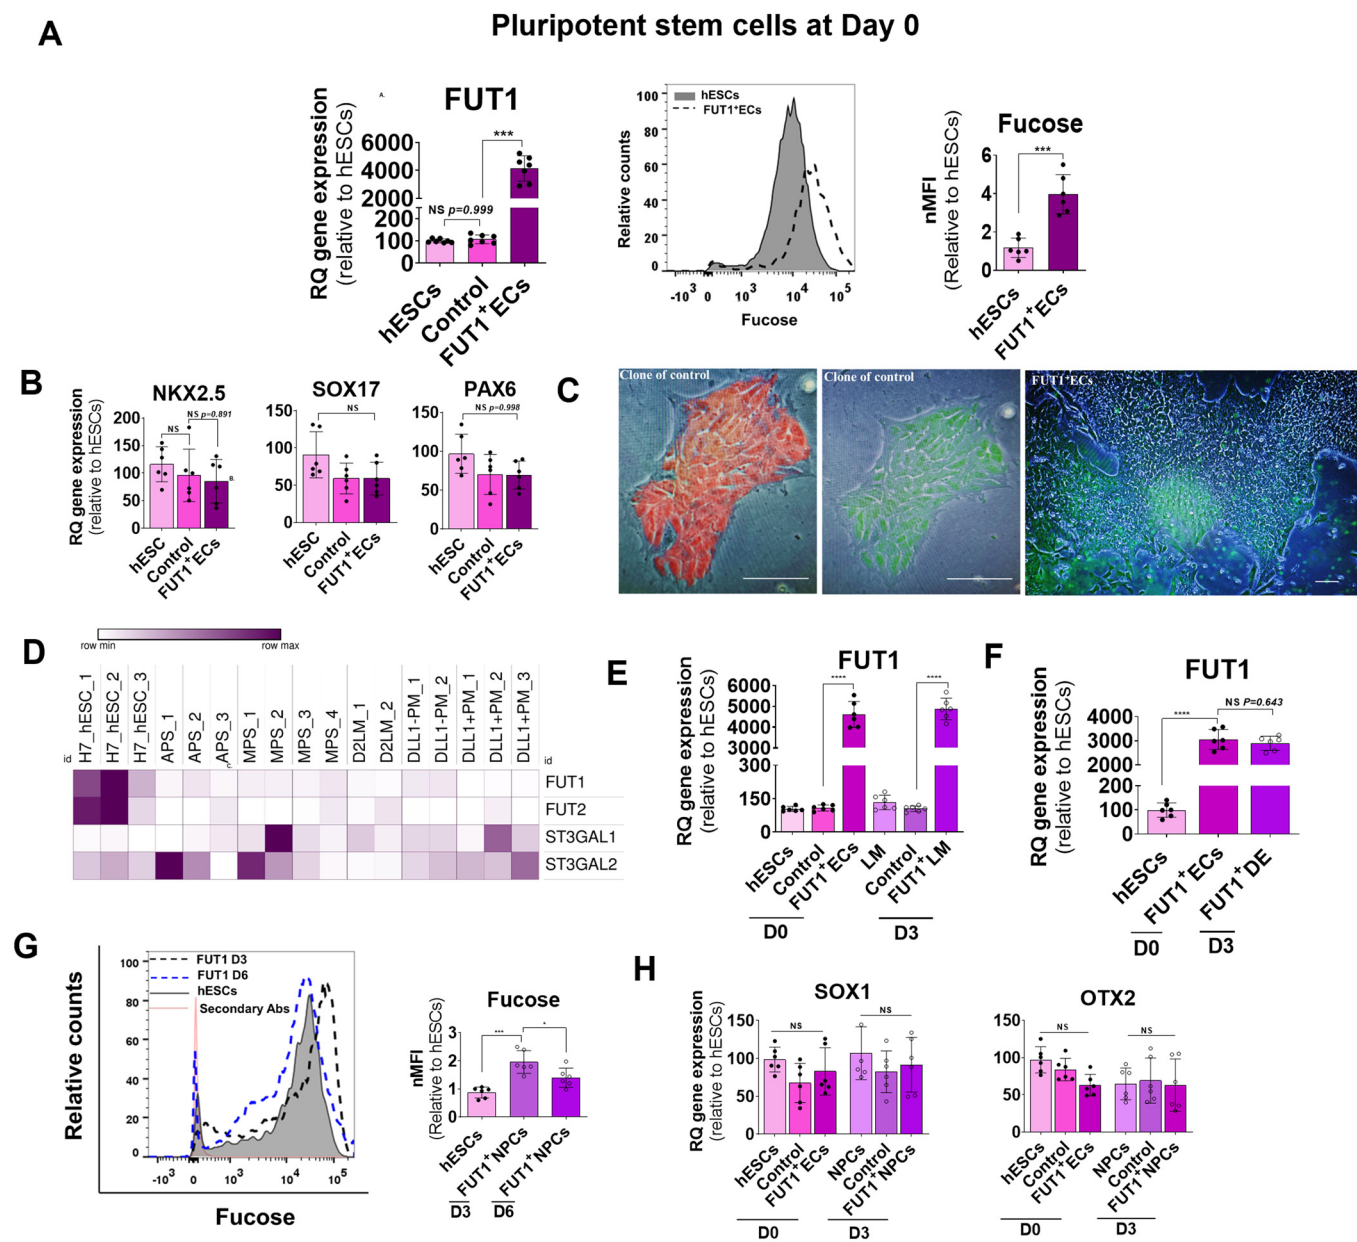

**Figure E4. Continuous expression of FUT1 amplifies the  $\alpha$ -fucosyl glycoconjugates and impairs hESC differentiation.**

(A) Left: Quantification of FUT1 transcripts in WT, mock-transfected (control ECs), and FUT1-transfected (FUT1<sup>+</sup>ECs), WA09 hESCs in 3 clones for each line after transfection. Right: Representative histograms showing relative counts and MFI of WT hESCs and FUT1<sup>+</sup>ECs expressing  $\alpha$ -fucose.  $n = 3$  technical replicates for each line. (B) Quantification of representative genes of the tri-germ layers, NKX2.5, SOX17, and PAX6, in WT hESCs and in 3 clones of control ECs and FUT1<sup>+</sup>ECs for each line showing unchanged genes after transfection. (C) Left and center: Representative brightfield and endogenous fluorescence protein (red, left) and (green, center) images showing clone of control ECs 18 d after culturing sorted cells. Right: Representative bright-field and endogenous fluorescence protein (green) image showing clone of FUT1<sup>+</sup>ECs 18 d after culturing sorted cells. Scale bars represent 100  $\mu\text{m}$ .  $n = 3$  technical replicates. (D) Heatmap of subset of RNA-seq-based gene expression profiles showing low expression of FUT1 1 d after H7 hESC differentiation into tissues that differentially expressed GT genes. Anterior primitive streak (APS), day 1 mid PS (MPS), and day 2 LM, PM, DLL<sup>-</sup>, and DLL<sup>+</sup>, PM cells.  $n = 3$  per group. (E) Quantification of the mRNA expression levels of FUT1 in WT hESCs, control ECs, and FUT1<sup>+</sup>ECs on day 0 and after differentiation into LM for 3 d showing high and constant expression of FUT1. (F) Quantification of the mRNA expression levels of FUT1 in WT hESCs and FUT1<sup>+</sup>ECs on day 0 and after differentiation into DE for 3 d showing high and constant expression of FUT1.  $n = 3$  technical replicates. Error bars represent  $\pm$  SDs. (G) Representative histograms of relative counts and MFI of WT hESCs and FUT1<sup>+</sup>ECs showing the expression of  $\alpha$ -fucose residues in WT hESCs and FUT1<sup>+</sup>ECs after differentiation into NPCs for 3 d and 6 d. (H) Quantification of NE markers showing SOX1 and OTX2 mRNA expression in WT hESCs, control ECs and FUT1<sup>+</sup>ECs on day 0 and after differentiation into NPCs for 3 d. In all experiments,  $n = 3$  technical replicates. Data information: In (A, G), data are presented as means  $\pm$  SD. Ordinary One-way ANOVA  $**P < 0.01$ ,  $***P < 0.001$ . In (A, B, E, H), data are presented as means  $\pm$  SEM. Two-tailed Student's t-tests  $****p < 0.0001$  or non-significance (NS).

**A**

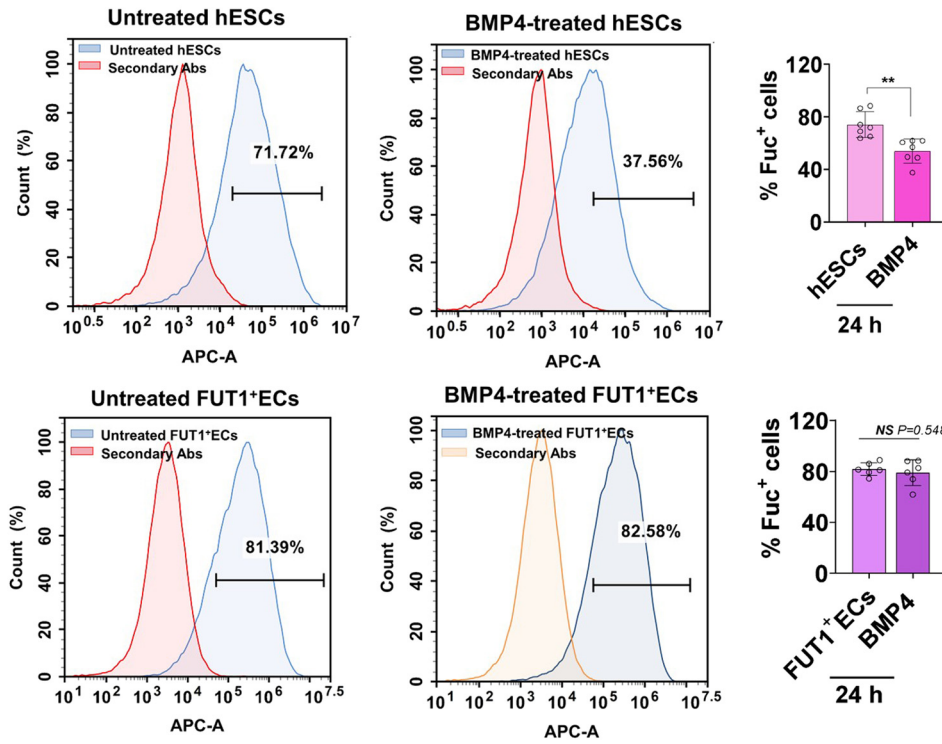

**B**

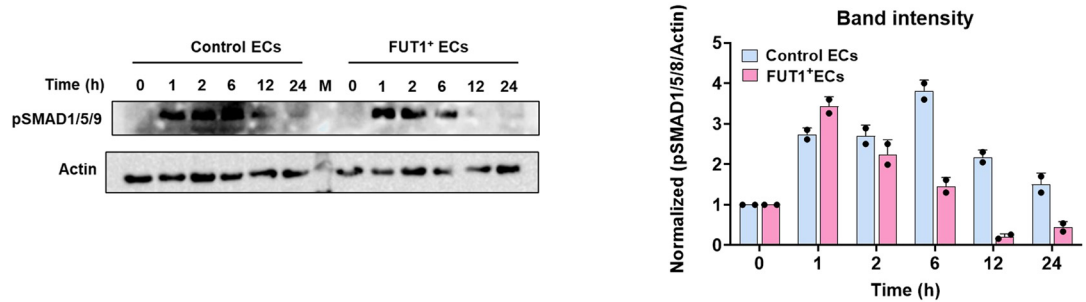

**C**

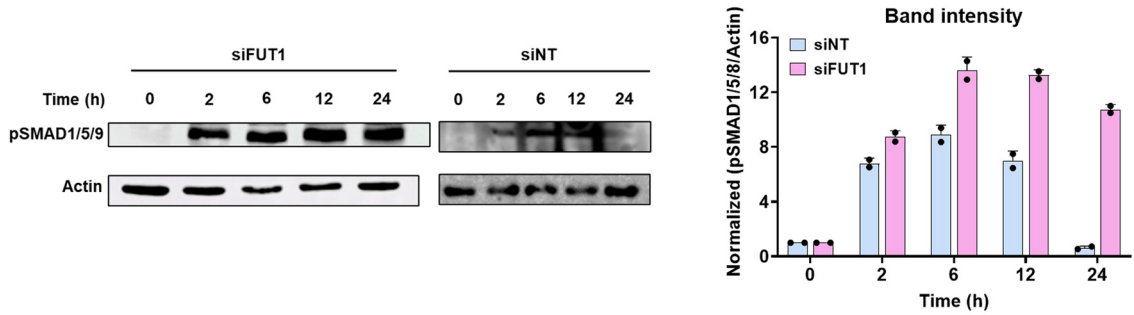

**D**

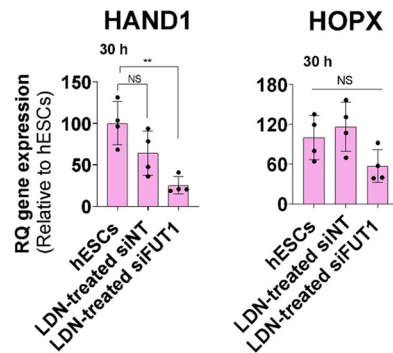



**◀ Figure EV5. Constitutive expression of  $\alpha$ -fucosyl end groups interferes with BMP signaling.**

(A) Top left: Representative histograms showing relative counts of WT hESCs expressing  $\alpha$ -fucose residues before and after BMP4 treatment for 24 h. Top right: Quantification of the percent of positive WT hESCs expressing  $\alpha$ -fucose residues before and after BMP4 treatment for 24 h.  $n = 3$  clones for each clone  $n = 2$  technical replicates. Bottom left: Representative histograms showing relative counts of FUT1<sup>+</sup>ECs expressing  $\alpha$ -fucose residues before and after BMP4 treatment for 24 h. Bottom right: Quantification of the percent of positive FUT1<sup>+</sup>ECs expressing  $\alpha$ -fucose residues before and after BMP4 treatment for 24 h.  $n = 3$  clones for each clone  $n = 2$  technical replicates. (B) Left: Western blots of pSMAD1/5/8 and  $\beta$ -actin showing a time-course of Smad1/5/8 activity within FUT1<sup>+</sup>ECs and control ECs after BMP4 stimulation for 24 h. Right: Quantification of the pSMAD1/5/8 intensities. The normalized values are relative to normalized  $\beta$ -actin.  $n = 2$  technical replicates. (C) Left: Western blots of pSMAD1/5/8 and  $\beta$ -actin showing a time-course of Smad1/5/8 activity within silenced FUT1 and siNT cells after BMP4 stimulation for 24 h. Right: Quantification of the pSMAD1/5/8 intensities. The normalized values are relative to normalized  $\beta$ -actin.  $n = 2$  technical replicates. (D) Quantification of HAND1 and HOPX 30 h after FUT1 silencing and 6 h after LDN193189 stimulation in WT, siNT, and siFUT1 hESCs relative to WT hESCs.  $n = 4$  biological replicates. Data information: In (A, D), data are presented as means  $\pm$  SD. Two-tailed Student's t-tests \*\* $p < 0.01$  or non-significance (NS).
